# Supplementary material
Source: HighWire-hosted journal article supplement (https://jnm.snmjournals.org/highwire/filestream/94278/field_highwire_adjunct_files/0/92650_Supplemental_Data.pdf)
Supplement: 92650_Supplemental_Data.pdf [file 92650_Supplemental_Data.pdf]

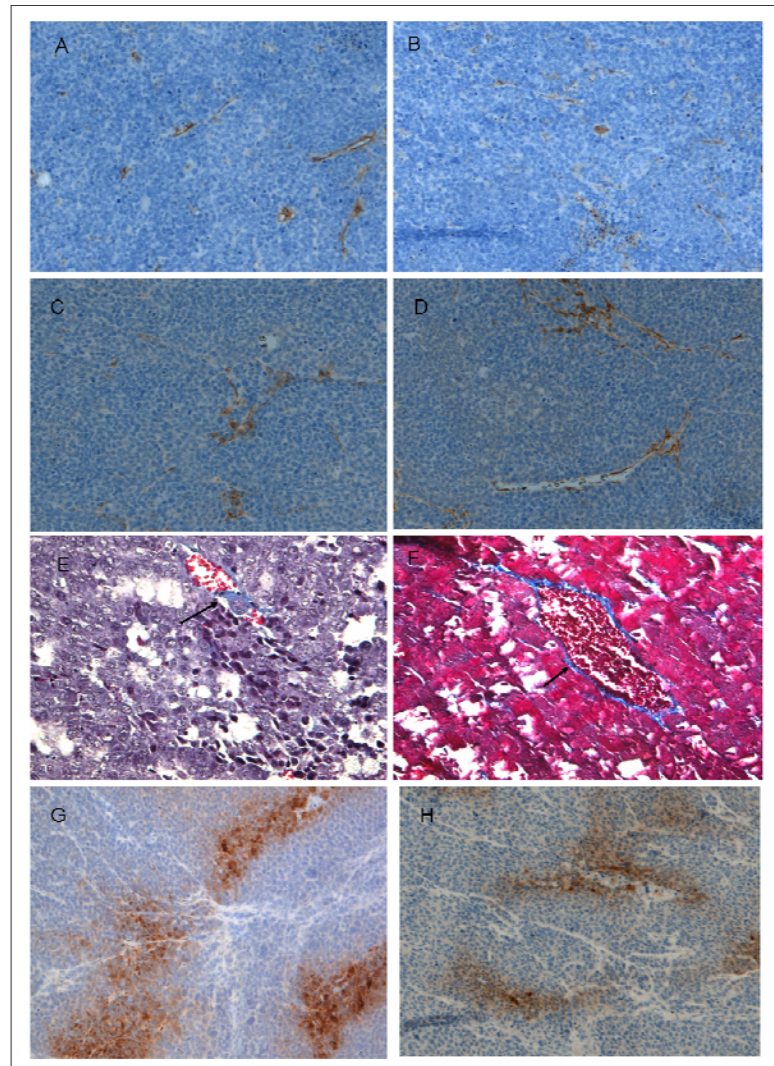

**FIGURE 1** Representative photomicrographs of A) and B) von Willebrand Factor staining (200x), C) and D) alpha-smooth muscle actin staining (200x), E) Masson's Trichrome staining with a bloodvessel surrounded by collagen which colours blue (indicated by an arrow, 400x) and F) Masson's Trichrome staining with a bloodvessel ( black arrow, 400x) in muscle tissue with clear collagen (blue) G) hypoxia (pimonidazole) staining (400x) and H) hypoxia (pimonidazole) staining (200x).

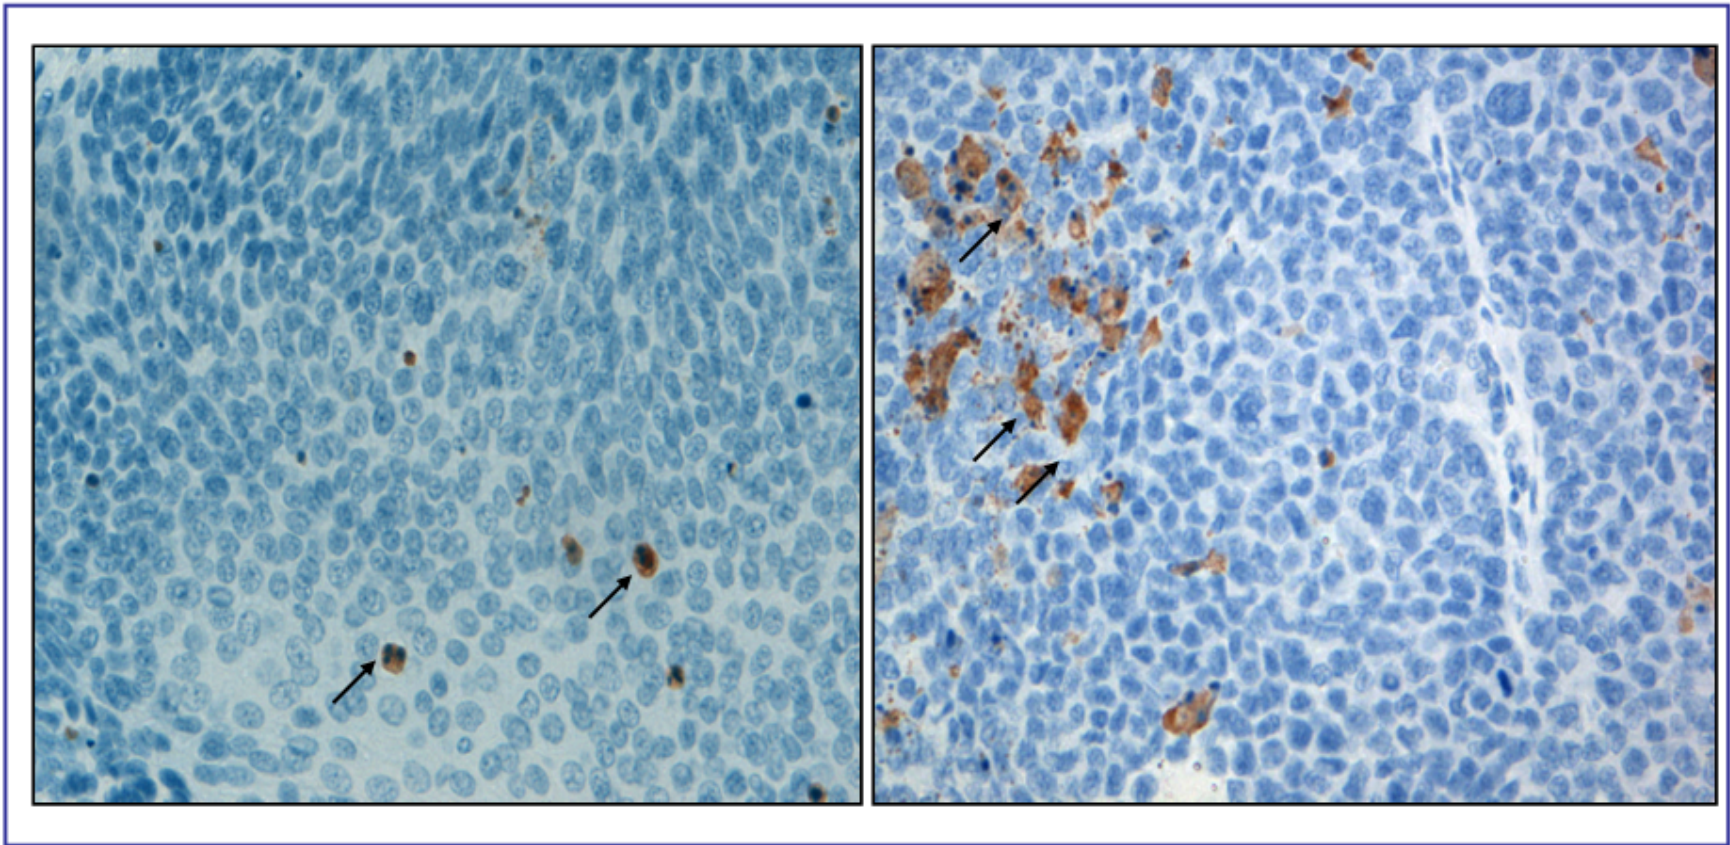

**FIGURE 2** Representative photomicrographs of caspase-3 immunostaining (200x). Black arrows indicate apoptotic cell fragments.

**TABLE 1**

Information of the performed immunohistochemical stainings

| Antibody              | Company                      | AG retrieval        | Dilution + incubation primary antibody | Secondary antibody                                  | Kit                    |
|-----------------------|------------------------------|---------------------|----------------------------------------|-----------------------------------------------------|------------------------|
| caspase-3             | Cell Signaling Techn. # 9661 | citrate, 10 min     | 1/400, 4°C overnight                   | RTU, 30 min<br>(polymer-HRP<br>anti-rabbit)         | Dako Envision          |
| α-smooth muscle actin | Abcam, ab5694                | citrate, 10 min     | 1/100, 1 hour                          | RTU, 30 min<br>(polymer-HRP anti-rabbit)            | Dako Envision          |
| von Willebrand factor | Dako, A0082                  | proteinase K, 7 min | 1/300, 1 hour                          | Biotinylated Goat<br>Anti-polyvalent<br>RTU, 10 min | Ultrasense ImmunoLogic |
| Hypoxyprobe-1 Mab1    | Chemicon International       | citrate, 10 min     | 1/1000, 1 hour                         | Rabbit Anti-FITC HRP, 1/50, 30 min                  | Dako Envision          |

AG= antigen retrieval; RTU= ready-to-use; HRP= horseradish peroxidase

**TABLE 2**

Primer sequences of all genes

| Gene                                                          | Species | Forward primer              | Reverse primer                 |
|---------------------------------------------------------------|---------|-----------------------------|--------------------------------|
| hypoxanthine guanine phosphoribosyl transferase (HPRT)        | human   | TGA CAC TGG CAA AAC AAT GCA | GGT CCT TTT CAC CAG CAA GCT    |
| succinate dehydrogenase complex, subunit A (SDHA)             | human   | TGG GAA CAA GAG GGC ATC TG  | CCA CCA CTG CAT CAA ATT CAT G  |
| vascular endothelial growth factor A (VEGF-A)                 | human   | TCCTCACACCATTGAAACCA        | GATCCTGCCCTGTCTCTCTG           |
| angiopoetin (Ang-1)                                           | human   | GGACAGCAGGAAAACAGAGC        | CACAAGCATCAAACCACCAT           |
| HPRT                                                          | mouse   | GTT AAG CAG TAC AGC CCC AAA | AGG GCA TAT CCA ACA ACA AAC TT |
| hydroxymethyl-bilane synthase (HMBS)                          | mouse   | AAG GGC TTT TCT GAG GCA CC  | AGT TGC CCA TCT TTC ATC ACT G  |
| alpha-smooth muscle actin ( $\alpha$ -SMA)                    | mouse   | CCA GCA CCA TGA AGA TCA AG  | TGG AAG GTA GAC AGC GAA GC     |
| platelet/endothelial cell adhesion molecule 1 (PECAM-1, CD31) | mouse   | TGCCTTGTTTCATGTTGGGTA       | CCTCAGAATATTCCAGGGCA           |
